# Supplementary material for: Luteolin Is a Potential Immunomodulating Natural Compound against Pulpal Inflammation
Source: Hindawi journal article supplement (doi:10.1155/2024/8864513), 2024-01-25
Supplement: f2 [file 8864513.f2.pdf]

## Supplementary Figure 1.

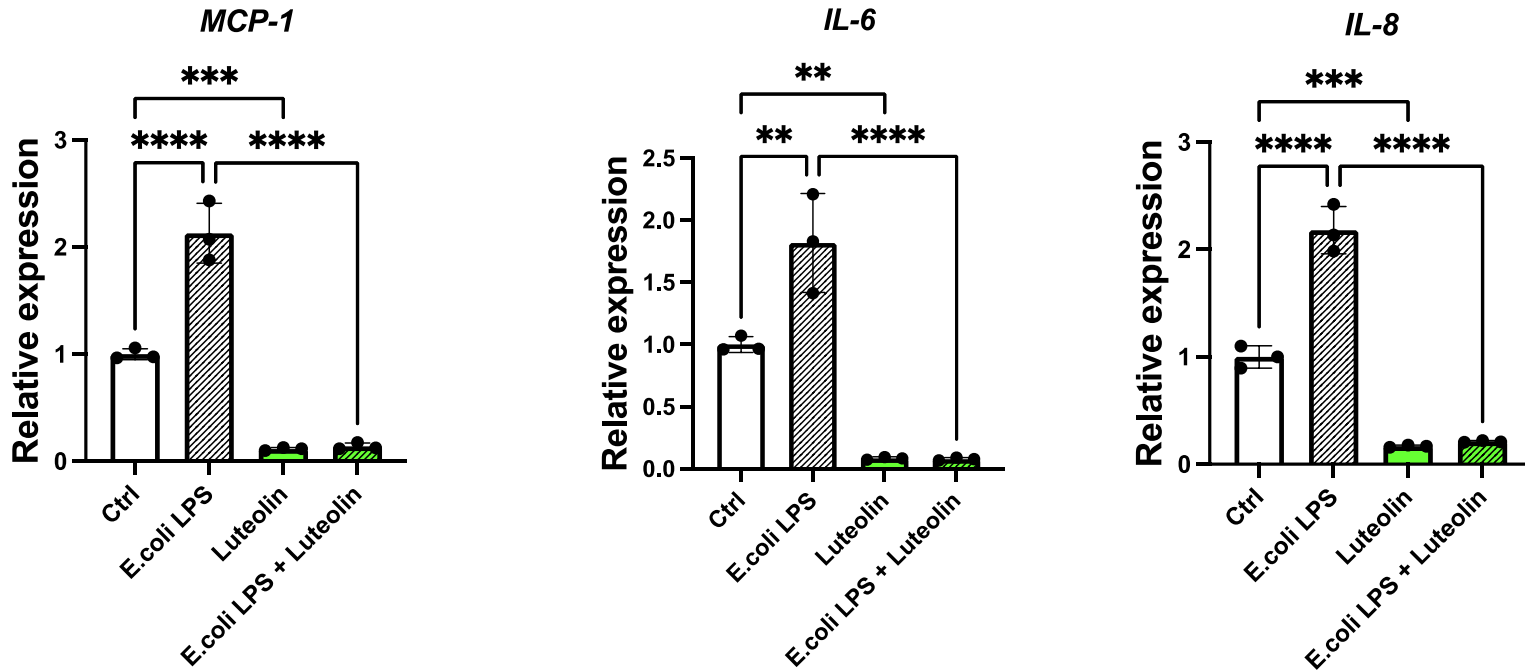

### Luteolin downregulates LPS-induced mRNA expressions of MCP-1, IL-6 and IL-8 in dental pulp cells.

DP-1 cells were stimulated with *E. coli* LPS (10 ng/ml) for 3 h with or without pre-treatment with luteolin (200  $\mu$ M) for 24 h (n = 3).

\*\*p < 0.01, \*\*\*p < 0.001, \*\*\*\*p < 0.0001. Error bars represent means  $\pm$  SD. Data were analyzed using independent unpaired two-tailed Student's t-tests.
